# Supplementary material for: Ion‐scale secondary flux ropes generated by magnetopause reconnection as resolved by MMS
Source: PubMed Central journal article supplement (PMC5001194; doi:10.1002/2016gl068747), 2016-05-18
Supplement: GRL-43-4716-s001.pdf [file GRL-43-4716-s001.pdf]

**Ion-scale secondary flux-ropes generated by magnetopause reconnection as resolved by MMS**

J. P. Eastwood,<sup>1</sup> T. D. Phan,<sup>2</sup> P. A. Cassak,<sup>3</sup> D. J. Gershman,<sup>4,5</sup> C. Haggerty,<sup>6</sup> K. Malakit,<sup>7</sup> M. A. Shay,<sup>6</sup> R. Mistry,<sup>1</sup> M. Øieroset,<sup>2</sup> C. T. Russell,<sup>8</sup> J. A. Slavin,<sup>9</sup> M. R. Argall,<sup>10</sup> L. A. Avanov,<sup>4,5</sup> J. L. Burch,<sup>11</sup> L. J. Chen,<sup>4,5</sup> J. C. Dorelli,<sup>4</sup> R. E. Ergun,<sup>12</sup> B. L. Giles,<sup>4</sup> Y. Khotyaintsev,<sup>13</sup> B. Lavraud,<sup>14,15</sup> P. A. Lindqvist,<sup>16</sup> T. E. Moore,<sup>4</sup> R. Nakamura,<sup>17</sup> W. Paterson,<sup>4</sup> C. Pollock,<sup>18</sup> R. J. Strangeway,<sup>8</sup> R. B. Torbert,<sup>10,11</sup> and S. Wang<sup>4,5</sup>

<sup>1</sup>The Blackett Laboratory, Imperial College London, London, UK

<sup>2</sup>Space Sciences Laboratory, University of California, Berkeley, CA, USA

<sup>3</sup>Dept. of Physics and Astronomy, West Virginia University, Morgantown, WV, USA

<sup>4</sup>NASA Goddard Space Flight Center, Greenbelt, MD, USA

<sup>5</sup>University of Maryland, College Park, MD, USA

<sup>6</sup>Department of Physics and Astronomy, University of Delaware, Newark, DE, USA

<sup>7</sup>Department of Physics, Mahidol University, Bangkok 10400, Thailand

<sup>8</sup>University of California, Los Angeles, Los Angeles, CA, USA

<sup>9</sup>Department of Climate and Space Sciences and Engineering, University of Michigan, Ann Arbor, MI, USA

<sup>10</sup>University of New Hampshire, Durham, NH, USA

<sup>11</sup>Southwest Research Institute, San Antonio TX, USA

<sup>12</sup>University of Colorado LASP, Boulder, Colorado, USA

<sup>13</sup>Swedish Institute of Space Physics, Uppsala, Sweden

<sup>14</sup>Institut de Recherche en Astrophysique et Planétologie, Université de Toulouse, France

<sup>15</sup>Centre National de la Recherche Scientifique, UMR 5277, Toulouse, France

<sup>16</sup>Royal Institute of Technology, Stockholm, Sweden

<sup>17</sup>Space Research Institute, Austrian Academy of Sciences, Graz, Austria

<sup>18</sup>Denali Scientific, Healy AK, USA

**Supplementary information: computer simulation**

The simulation was performed using the P3D code [Zeiler et al. 2002]. The simulation data are presented in a coordinate system that is directly comparable to GSE. The simulation is 2.5 dimensional ( $\partial/\partial y = 0$ ), and the  $(x,z)$  domain is 20.48 x 40.96 (grid scale 0.01) in distance units normalized to the magnetosheath ion inertial length. The ion to electron mass ratio is 100, and  $c/V_{A,m'sheath} = 15$  where  $V_{A,m'sheath}$  is the magnetosheath Alfvén speed. The time step for the particles is 0.001 times the inverse of the ion cyclotron frequency in the magnetosheath.

Initially the simulation is set up with a double hyperbolic tangent profile variation in the  $x$  direction of the  $z$  component of the magnetic field and the temperature. This corresponds to

two current sheets extending along the  $z$  direction at different values of  $x$ , contained within the domain.

The magnetic field profile across each of these current sheets is matched to a magnetospheric reconnecting magnetic field  $B_z = 39$  nT and a reconnecting magnetosheath magnetic field  $B_z = 23$  nT. The temperature and density profiles are set to ensure the plasma is initially in pressure balance and at rest, consistent with the magnetosheath properties (here chosen such that  $n = 11.3$  cm<sup>-3</sup> and  $T = 232.5$  eV). Since the simulation time and length scales are normalized to the magnetosheath values, the simulation unit of length = 67.8 km, and the simulation unit of time = 2.22 s. The code and parameters are the same as those used in Burch et al. [2016].

Figure 4 in the main manuscript shows a small portion of the simulation domain at  $t = 16$ . Note that the coordinate system has been shifted, so that the current sheet lies along  $x = 0$ . Similar structure and dynamics are observed at the other current sheet (not shown).

Burch, J. L., et al. (2016), Electron-scale measurements of magnetic reconnection in space, *Science*, doi: 10.1126/science.aaf2939.

Zeiler, A., D. Biskamp, J. F. Drake, B. N. Rogers, and M. A. Shay (2002), Three-dimensional particle simulations of collisionless magnetic reconnection, *J. Geophys. Res.*, 107(A9), 1230, doi:10.1029/2001JA000287.
